# Supplementary material for: Flavanol Bioavailability in Two Cocoa Products with Different Phenolic Content. A Comparative Study in Humans
Source: MDPI journal article supplement (doi:10.3390/nu11071441), 2019-06-26
Supplement: s1 [file s1]

**Figure S1.** Representative high-performance liquid chromatography-diode array (HPLC-DAD) chromatograms of phenolic compounds of a conventional soluble cocoa (CC) (upper panel, **a**) and a flavanol-rich soluble cocoa (CC-PP) (lower panel, **b**) registered at 280 nm.

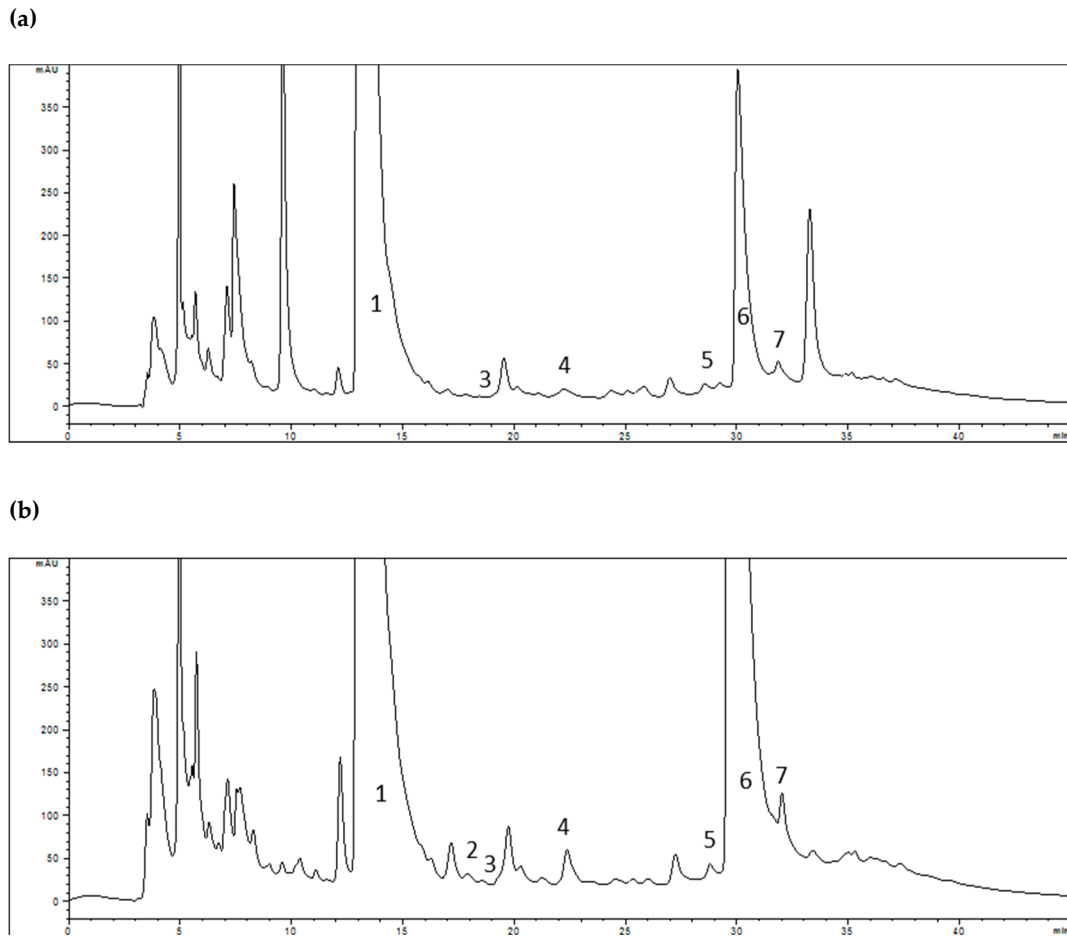

**Table S1.** Retention times and  $\lambda_{\max}$  of the compounds identified by high-performance liquid chromatography-diode array (HPLC-DAD) and the masses of each of the flavonoid identified determined by high-performance liquid chromatography coupled to electrospray ionisation and quadrupole time-of-flight mass spectrometry (HPLC-ESI-QToF-MS).

| Peak | Name           | RT (min) | $\lambda_{\max}$ | [M-H] <sup>-</sup> | Fragments ions |
|------|----------------|----------|------------------|--------------------|----------------|
| 1    | Theobromine    | 13.5     | 272              | -                  | -              |
| 2    | Theophylline   | 18.0     | 272              | -                  | -              |
| 3    | Procyanidin B1 | 18.8     | 280              | 577                | 289            |
| 4    | Catechin       | 22.4     | 280              | 289                | 245            |
| 5    | Procyanidin B2 | 28.9     | 280              | 577                | 289            |
| 6    | Caffeine       | 30.4     | 272              | -                  | -              |
| 7    | Epicatechin    | 32.0     | 280              | 289                | 245            |
